# Supplementary material for: Prediction of Sperm Progression in Three Dimensions Using Rapid Optical Imaging and Dynamic Mechanical Modeling
Source: Cells. 2022 Apr 13;11(8):1319. doi: 10.3390/cells11081319 (PMC9030059; doi:10.3390/cells11081319)
Supplement: Supplementary file 1 [file cells-11-01319-s001.zip]

Archive with 9 entries (9 files):
- cells-1625287-supplementary.pdf
- figure S1.jpg
- figure S2.jpg
- figure S3.jpg
- video1.mp4
- video2.mp4
- video3.mp4
- video4.mp4
- video5.mp4
